# Supplementary material
Source: publisher figshare collection journal article supplement (https://acs.figshare.com/ndownloader/files/5846997)
Supplement: Supplementary file 1 [file 5846997]

**Supporting Information**

*of*

**Cucurbit[8]uril Regulated Activatable Supramolecular Photosensitizer  
for Targeted Cancer Imaging and Photodynamic Therapy†**

Xiaoqiang Wang, Qi Lei, Jingyi Zhu, Wenjing Wang, Qian Cheng, Fan Gao, Yunxia Sun,\* and  
Xianzheng Zhang\*

Key Laboratory of Biomedical Polymers of Ministry of Education, the Institute for Advanced Studies &  
Department of Chemistry, Wuhan University, Wuhan 430072, P. R. China

\* Corresponding Authors. [yx-sun@whu.edu.cn](mailto:yx-sun@whu.edu.cn) (Y. X. Sun), [xz-zhang@whu.edu.cn](mailto:xz-zhang@whu.edu.cn) (X. Z. Zhang).

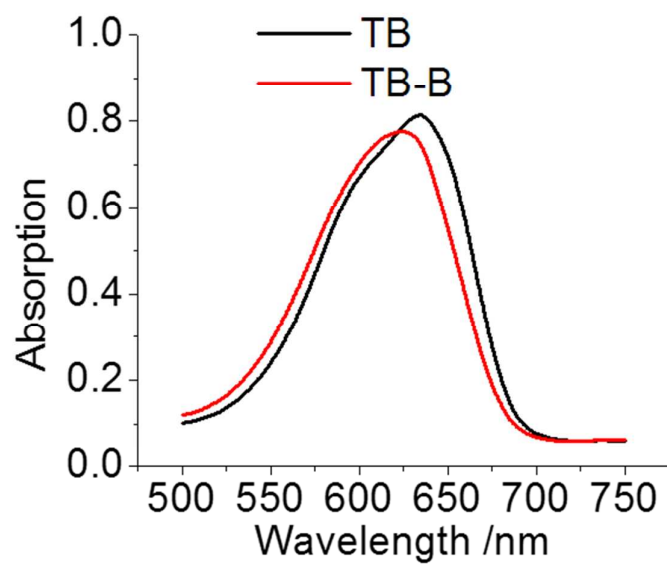

**Figure S1.** UV-VIS absorption of TB (20  $\mu\text{M}$ ) and TB-B (20  $\mu\text{M}$ ).

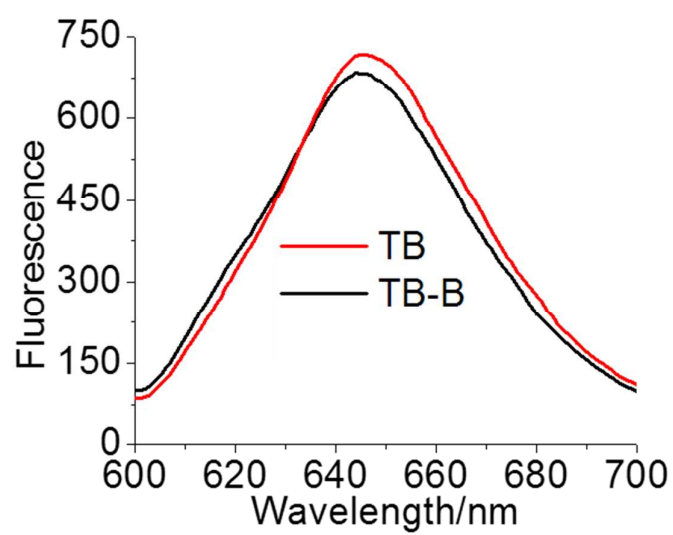

**Figure S2.** Fluorescence emission of TB (20  $\mu\text{M}$ ) and TB-B (20  $\mu\text{M}$ ).

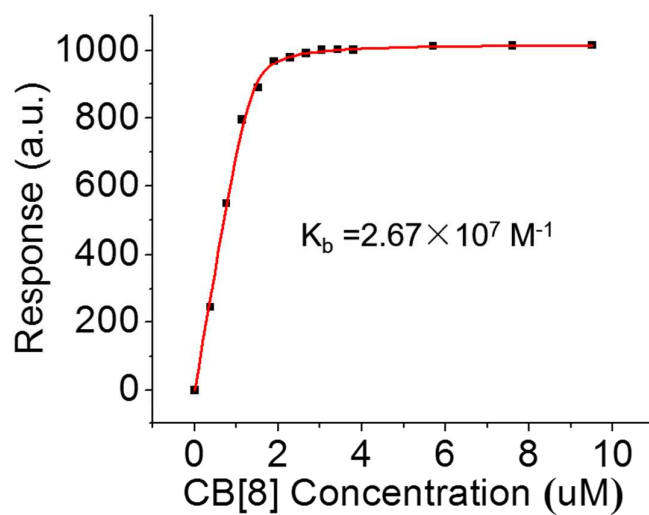

**Figure S3.** The binding curve of CB[8] and TB-B upon the titration of CB[8] (0-10  $\mu\text{M}$ ) into solution of TB-B (4  $\mu\text{M}$ ) in PBS (10mM, pH=7.4). Y-axis represent for the difference of TB-B fluorescence intensity at 647nm before and after the titration of CB[8].

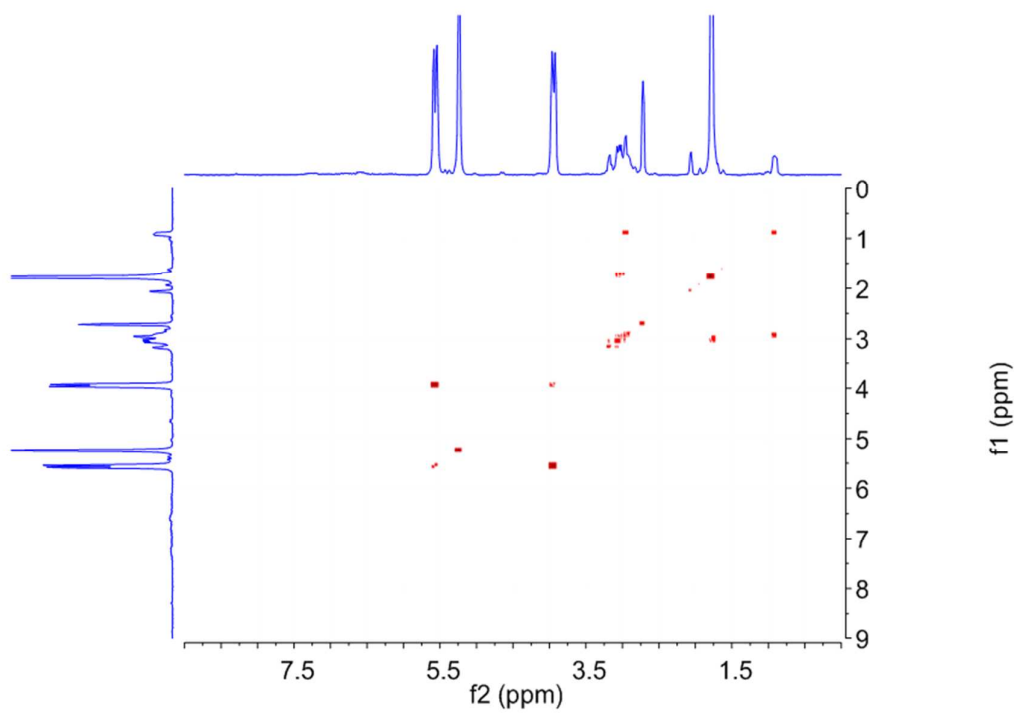

**Figure S4.** COSY NMR spectra of TB-B:CB[8] 2:1 (D<sub>2</sub>O, 3 mM)

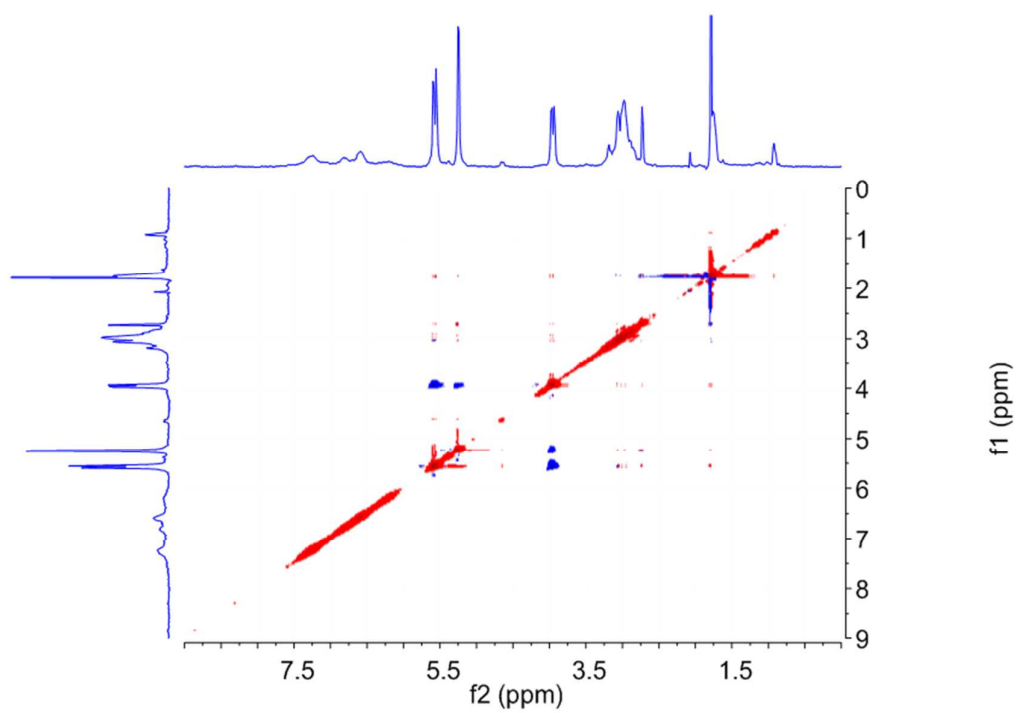

**Figure S5.** ROESY NMR spectra of TB-B:CB[8] 2:1 (D<sub>2</sub>O, 3 mM).

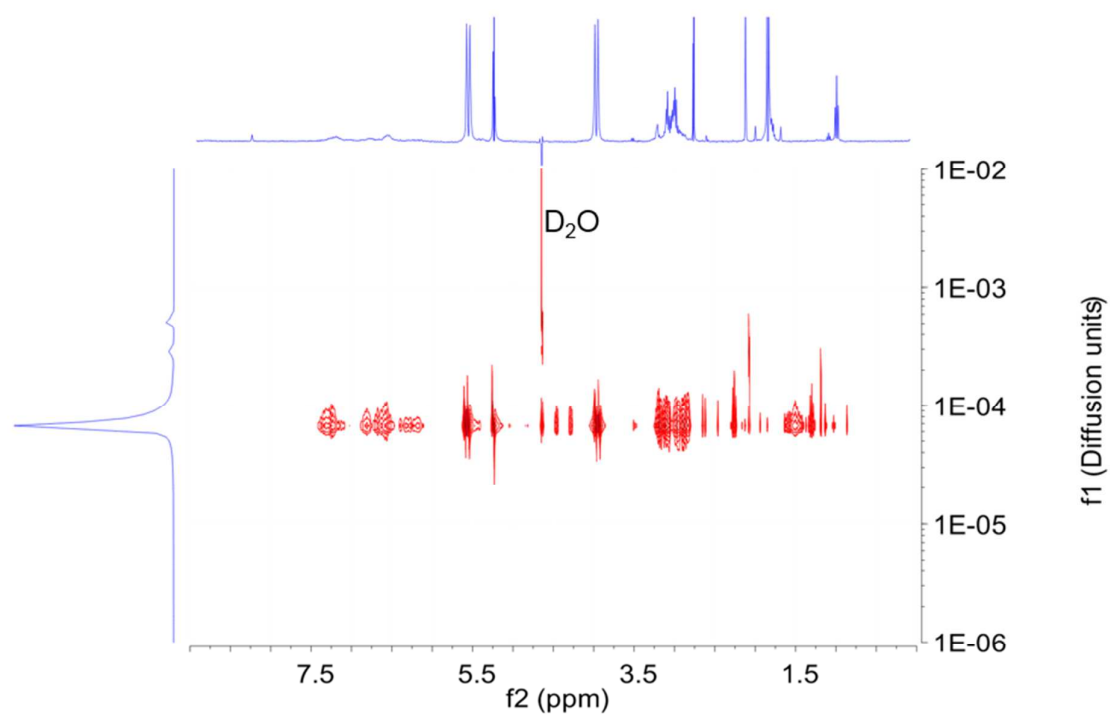

**Figure S6.** DOSY NMR spectra of TB-B:CB[8] 2:1 (D<sub>2</sub>O, 3 mM).

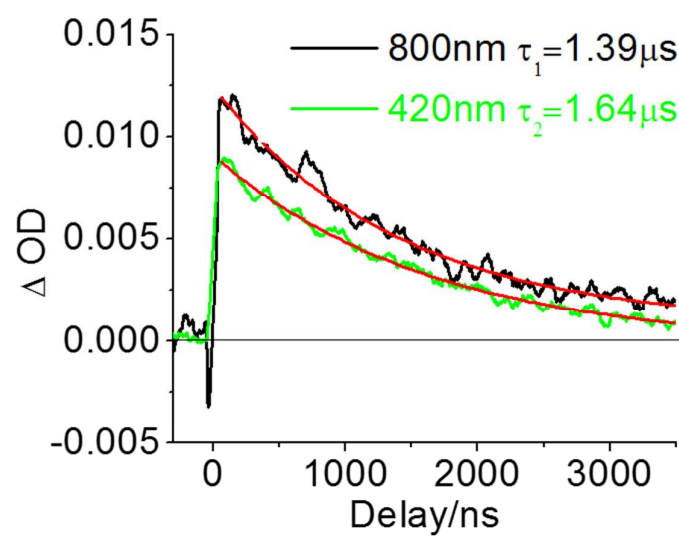

**Figure S7.** Decay curves of the transient absorption of TB-B at 420 nm and 800 nm.



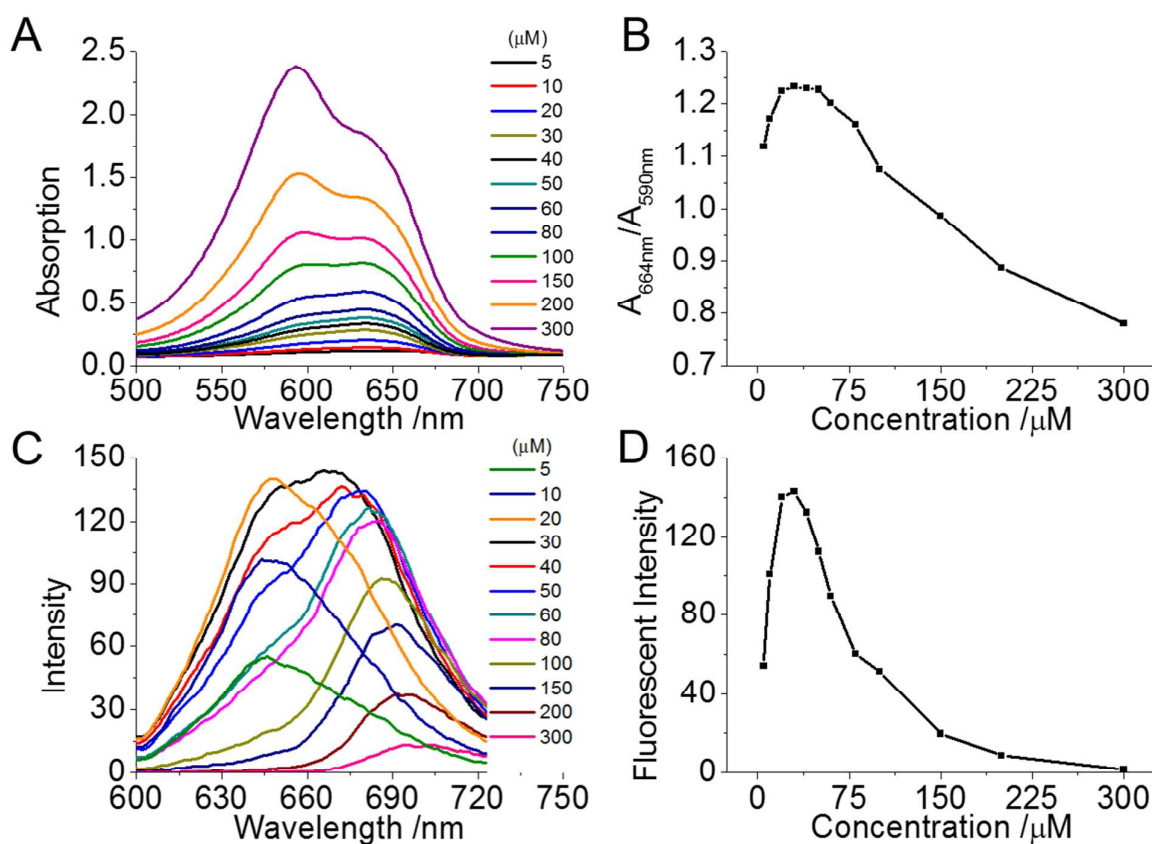

**Figure S8.** Optical properties of TB in different concentration. A) UV-Vis absorption of TB (5-300  $\mu\text{M}$ ) in PBS (10Mm, PH=7.4); B) Ratio of TB absorption at 630 nm (TB monomer absorption peak) and 590 nm (TB dimer absorption peak) in different concentration (5-300  $\mu\text{M}$ ); C) Fluorescent changes of TB (5-300  $\mu\text{M}$ ) in PBS (10Mm, PH=7.4); D) Fluorescent emission of TB at 647 nm in different concentration (5-300  $\mu\text{M}$ ).

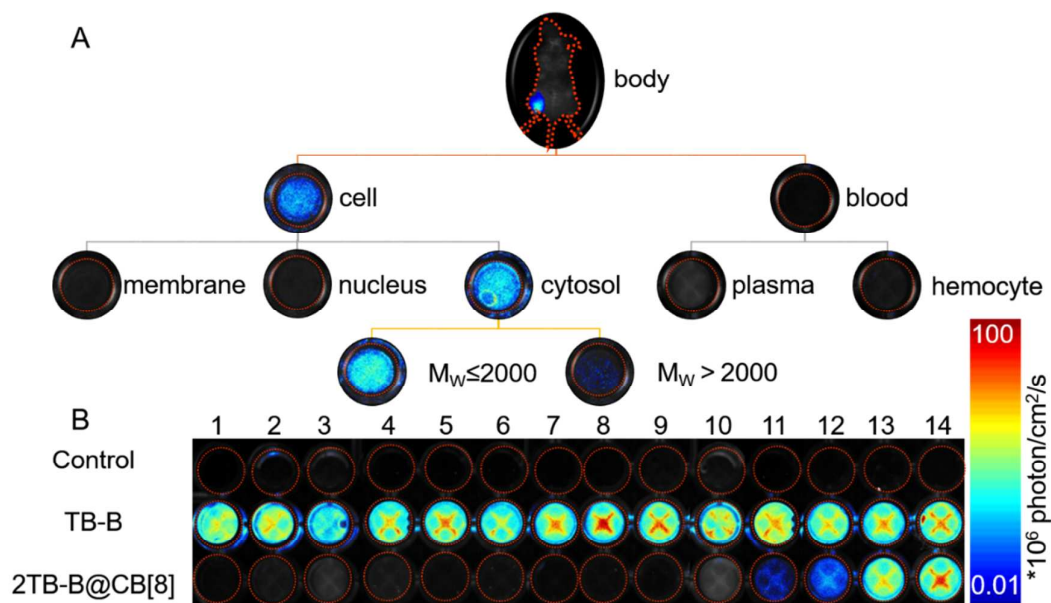

**Figure S9.** A) Separation of the components from the body and their influence to the fluorescence of 2TB-B@CB[8] imaged by *in vivo* imaging system; B) Fluorescent recovery of 2TB-B@CB[8] in various small molecular species (100  $\mu$ M in PBS). 1, glucose; 2, pyruvic acid; 3, glutamine; 4, lactic acid; 5, collection of salts ( $\text{Na}^+$ ,  $\text{K}^+$ ,  $\text{Ca}^{2+}$ ,  $\text{Mg}^{2+}$ ,  $\text{Fe}^{3+}$ ,  $\text{Zn}^{2+}$ ); 6, collection of 20 proteinogenic amino acids; 7, dipeptide GW; 8, dipeptide GY; 9, dipeptide GF; 10, dipeptide GG; 11, dipeptide WG; 12, dipeptide YG; 13, dipeptide FG; 14, tripeptide FGG.

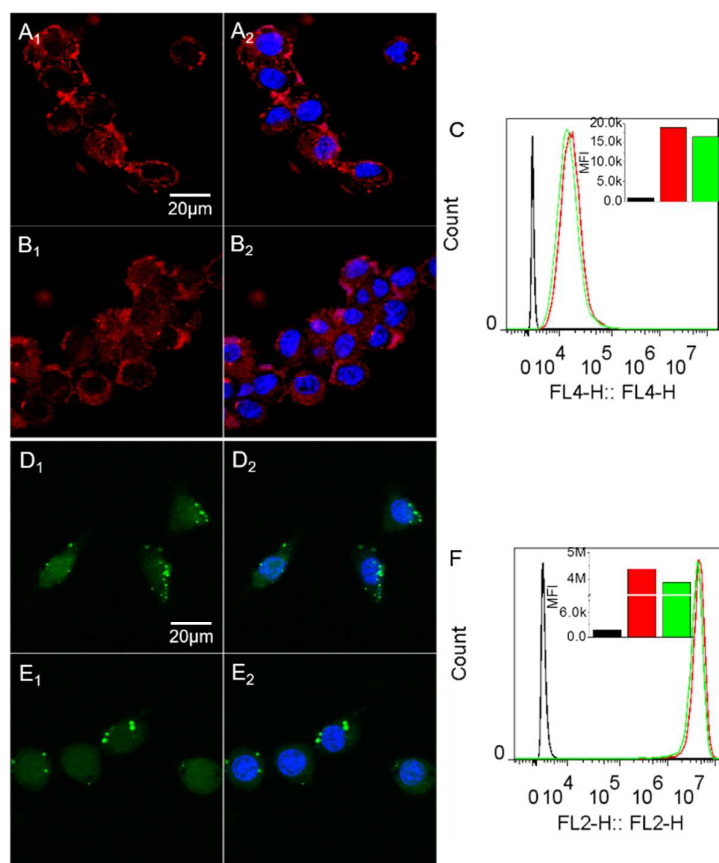

**Figure S10.** A-B) Confocal microscopy images showing SCC-7 cells incubated with A) TB-B (10 μM) and B) 2TB-B@CB[8] (5 μM) (red=TB, blue=nucleus); C) Quantitative flow cytometry analysis of the fluorescence of TB after SCC-7 cells incubated with TB-B (10 μM) and 2TB-B@CB[8] (5 μM) (black line=control, red line=TB-B, green line=2TB-B@CB[8], inset: mean fluorescence intensity (MFI) of TB); D-E) Confocal microscopy images showing intracellular ROS generation ability of D) TB-B (10 μM) and E) 2TB-B@CB[8] (5 μM) after incubated with SCC-7 cells and irradiation with 630nm LED light (power density 30mW/cm<sup>2</sup>, green=DCFH, blue=nucleus); F) Quantitative flow cytometry analysis of the fluorescence of TB after SCC-7 cells incubated with TB-B (10 μM) and 2TB-B@CB[8] (5 μM) followed by irradiation with 630nm LED light (black line=control, red line=TB-B, green line=2TB-B@CB[8], inset: mean fluorescence intensity (MFI) of DCFH).

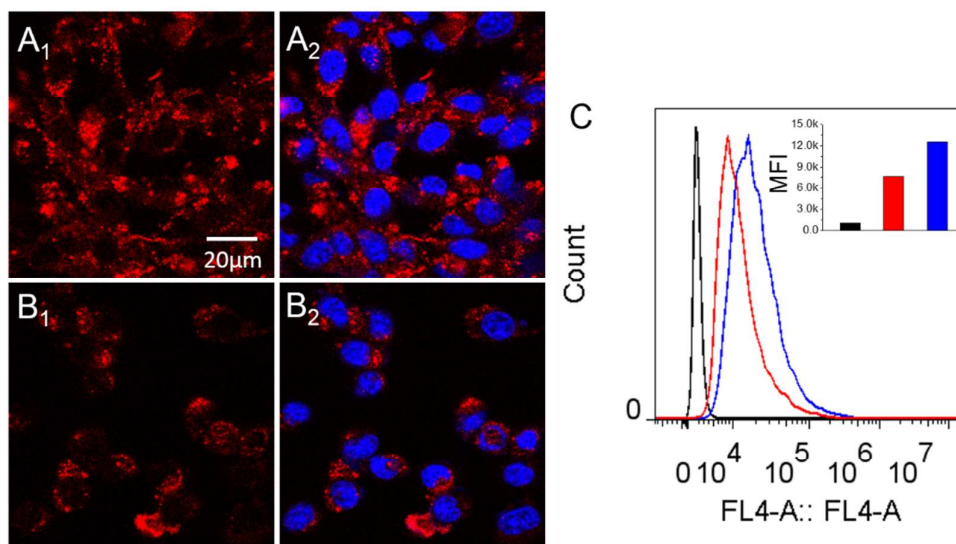

**Figure S11** A-B) Confocal microscopy images showing SCC-7 cells incubated with A) 2TB-B@CB[8] (5 μM) and B) 2TB@CB[8] (5 μM) (red=TB, blue=nucleus); C) Quantitative flow cytometry analysis of the fluorescence of TB after SCC-7 cells incubated with 2TB-B@CB[8] (5 μM) and 2TB@CB[8] (5 μM) (black line=control, red line=2TB@CB[8], green line=2TB-B@CB[8], inset: mean fluorescence intensity (MFI) of TB).

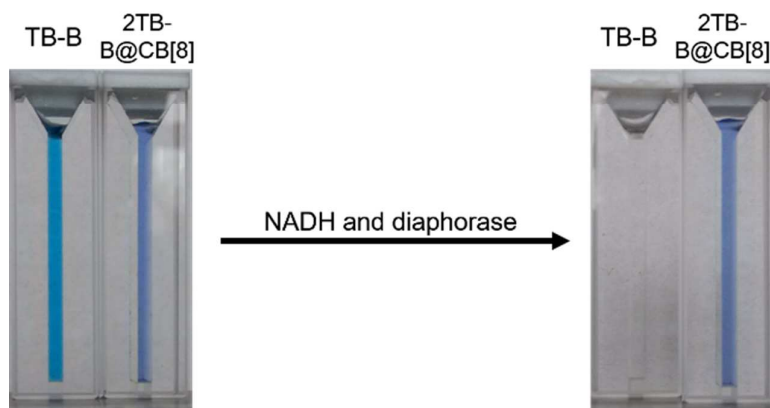

**Figure S12.** Color changes of TB-B (20  $\mu\text{M}$ ) and 2TB-B@CB[8] (10  $\mu\text{M}$ ) before and 30 min after the appearance of NADH (0.45 $\mu\text{mol}$ ) and diaphorase (0.05mg).

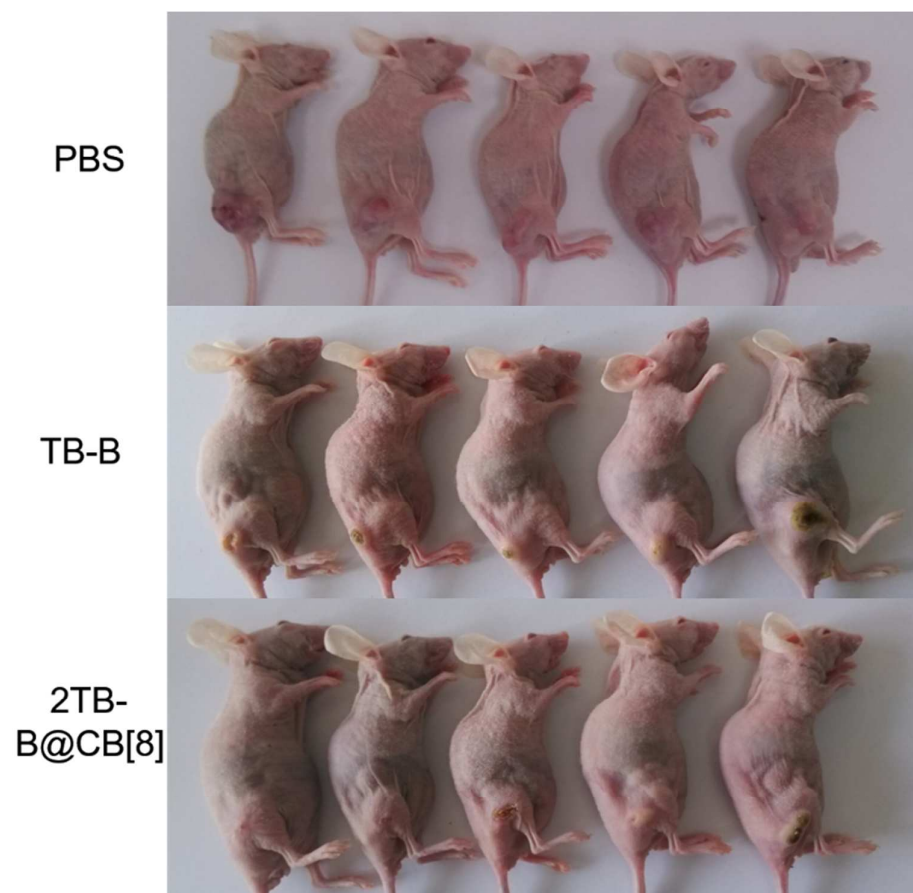

**Figure S13.** Images of the mice at the 12<sup>th</sup> day after treatment.

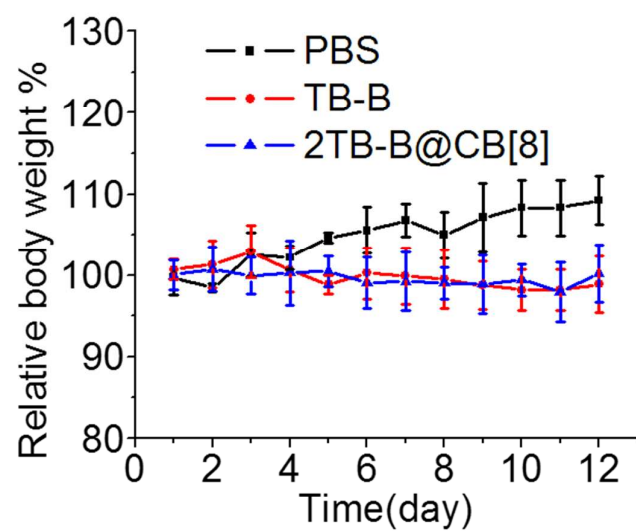

**Figure S14.** Relative body weight change during the treatment.
